# Supplementary material
Source: publisher figshare collection journal article supplement (https://acs.figshare.com/ndownloader/files/4393177)
Supplement: Supplementary file 1 [file 4393177]

## **Supporting Information:**

### **A Novel Ring-Shaped Phosphovanadomolybdate Built by Bicapped Pseudo-Keggin Clusters and Copper(II) Complexes**

Jingyang Niu, Guo Chen, Junwei Zhao, Chunfa Yu, Pengtao Ma, Jingping Wang\*

*<sup>1</sup>Institute of Molecular and Crystal Engineering, College of Chemistry and Chemical Engineering, Henan University, Kaifeng, Henan 475004, P. R. China; <sup>2</sup>College of Pharmacy, Henan University, Kaifeng, Henan 475004, P. R. China*

E-mail: jpwang@henu.edu.cn

#### **I. Experimental section**

#### **II. Crystal structure figures**

#### **III. Physical measurement and characterization**

#### **IV. Cationic exchange property study**

## I. Experimental Section.

**1. Materials and Methods:** All chemicals were commercially purchased and used without further purification. The TG analysis was conducted on Mettler-Toledo TGA/SDTA851° analyzer under the nitrogen gas atmosphere with a heating rate of 10 °C/min from 25 °C to 800 °C. UV spectrum was obtained on a Agilent HP8453 UV-Vis spectrometer (distilled water as solvent) in the range of 400–190 nm. IR spectrum was recorded on a Nicolet FT-IR 360 spectrometer using KBr pellets in the range of 4000–400  $\text{cm}^{-1}$ . C, H and N elemental analyses were performed on a Perkin-Elmer 2400-II CHNS/O analyzer. XPS analysis was performed on an AXIS ULTRA spectrometer with an Al  $K\alpha$  achromatic X-ray source. XRPD measurement was performed on a Philips X'Pert-MPD instrument with Cu  $K\alpha$  radiation ( $\lambda = 1.54056 \text{ \AA}$ ) in the angular range  $2\theta = 6\text{--}40^\circ$  at 293 K.

**2. The synthesis of compound 2:** A mixture of  $\text{CuCl}_2 \cdot 2\text{H}_2\text{O}$  (1.200 g, 7.039 mmol),  $\text{Na}_2\text{MoO}_4 \cdot 2\text{H}_2\text{O}$  (1.600 g, 6.613 mmol),  $\text{NH}_4\text{VO}_3$  (0.800 g, 6.839 mmol), 1,2-dap (0.600 mL, 7.042 mmol), phen (0.076 g, 0.384 mmol),  $\text{H}_3\text{PO}_4$  (0.5 mL, 50%) and distilled water (12 mL) at pH 7.0 was stirred for 20 min. The mixture was then transferred to a Teflon-lined stainless steel autoclave (30 mL) and kept at 170 °C for 6 days. After being slowly cooled to room temperature, block-shaped black crystals were isolated (42% based on Mo), then washed with distilled water and air-dried at room temperature.

**3. The cell parameter of compound 2:** Triclinic system, space group  $P\bar{1}$  with  $a = 12.5639(12)$ ,  $b = 18.0617(18)$ ,  $c = 20.306(2) \text{ \AA}$ ;  $\alpha = 67.512(1)$ ,  $\beta = 85.134(1)$ ,  $\gamma = 87.603(1)^\circ$ .

## II. Crystal structure figures.

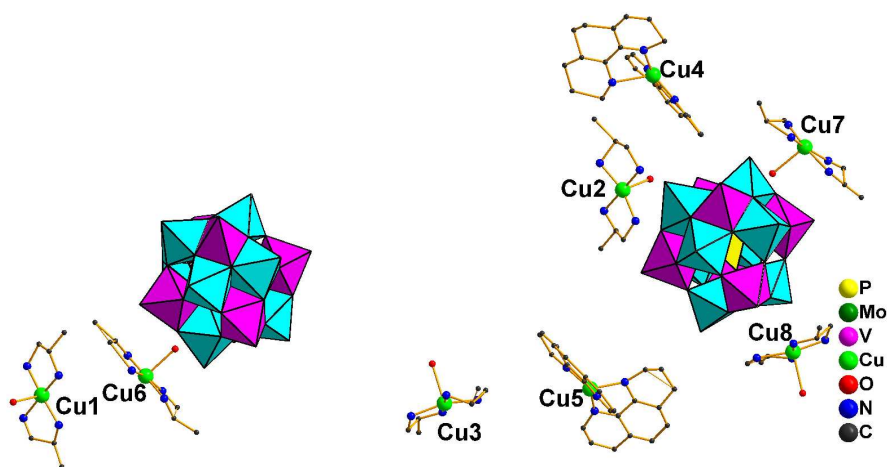

**Figure S1** Polyhedral/ball-and-stick view of 2.

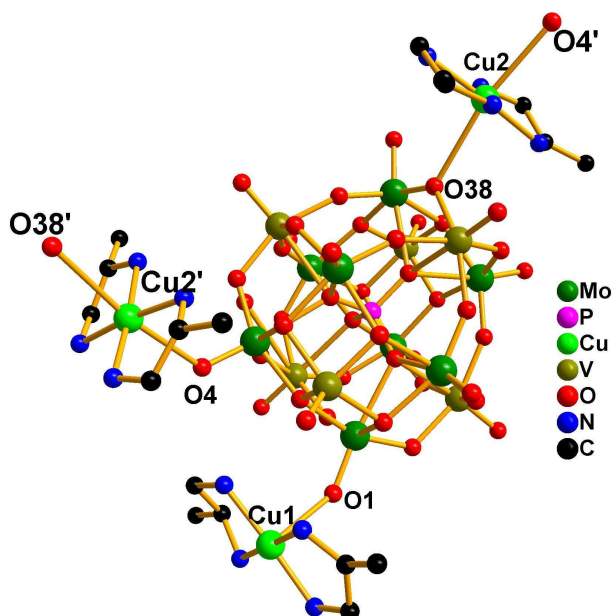

**Figure S2** Ball-and-stick view of the cluster  $[\text{Cu}(\text{1,2-dap})_2\{\text{PMo}^{\text{VI}}_8\text{V}^{\text{IV}}_4\text{O}_{40}(\text{V}^{\text{IV}}\text{O})_2\text{Cu}(\text{1,2-dap})_2\}]^{3-}$ .

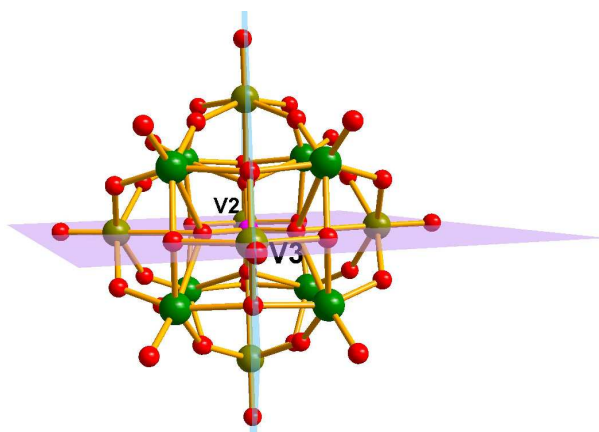

**Figure S3** The  $C_{2v}$  symmetry of the bicapped pseudo-Keggin structure.

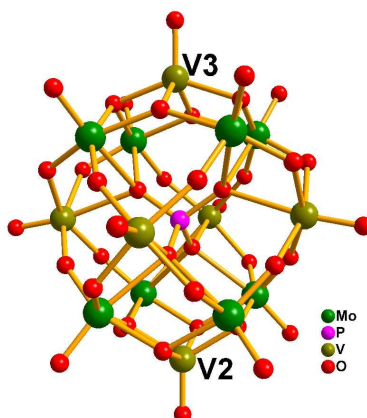

**Figure S4** The pseudo-Keggin anion capped by two five-coordinate  $\{\text{VO}\}$  units forming the bicapped pseudo-Keggin anion.

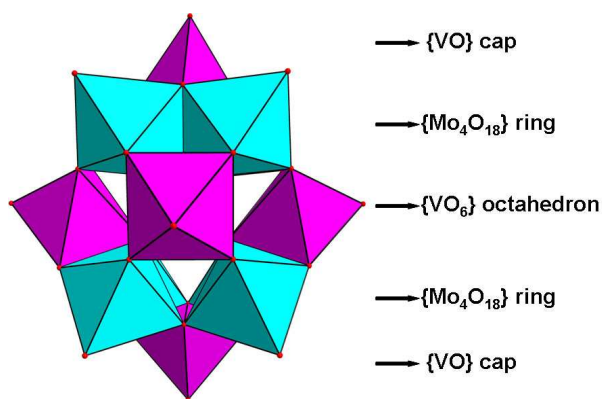

**Figure S5** Polyhedral view of the polyoxoanion cluster  $[\text{PMo}^{\text{VI}}_8\text{V}^{\text{IV}}_4\text{O}_{40}(\text{V}^{\text{IV}}\text{O})_2]^{7-}$  showing the alternating vanadium and molybdenum oxide layers.

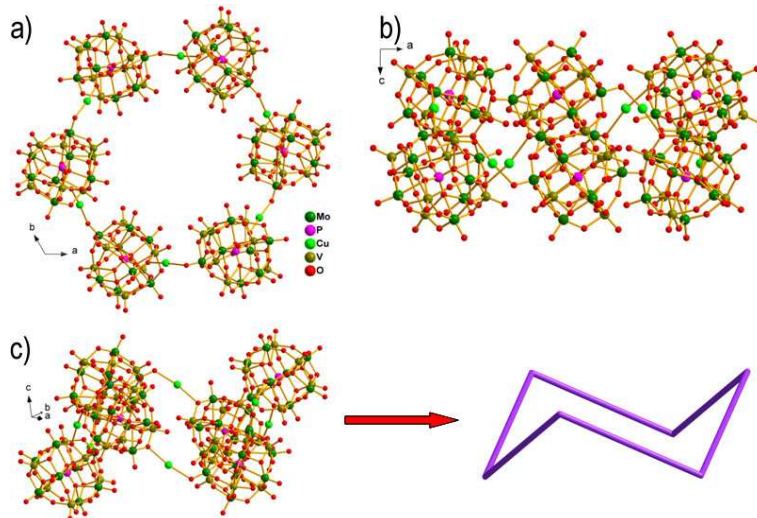

**Figure S6** Ball-and-stick view of the ring-shaped cluster **1a**. (a) viewed down the crystallographic  $c$  axis; (b) viewed down the crystallographic  $b$  axis; (c) side view: **1a** exhibits the cyclohexane-like ring-shaped structure. (All C, N and Cu1 atom are omitted for clarity)

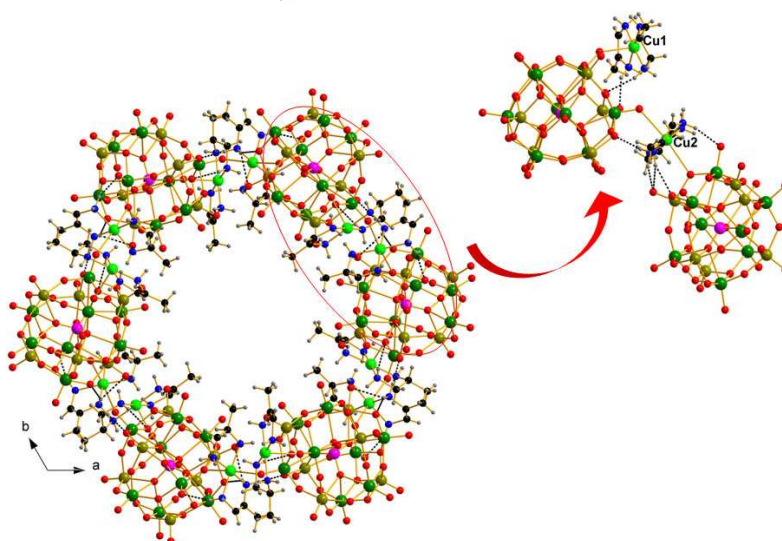

**Figure S7** The the N-H $\cdots$ O hydrogen bonds between  $[\text{Cu}(1,2\text{-dap})_2]^{2+}$ ,  $[\text{Cu}(2)(1,2\text{-dap})_2]^{2+}$  cations and **1b** clusters. Hydrogen bonds are shown as black dotted lines.

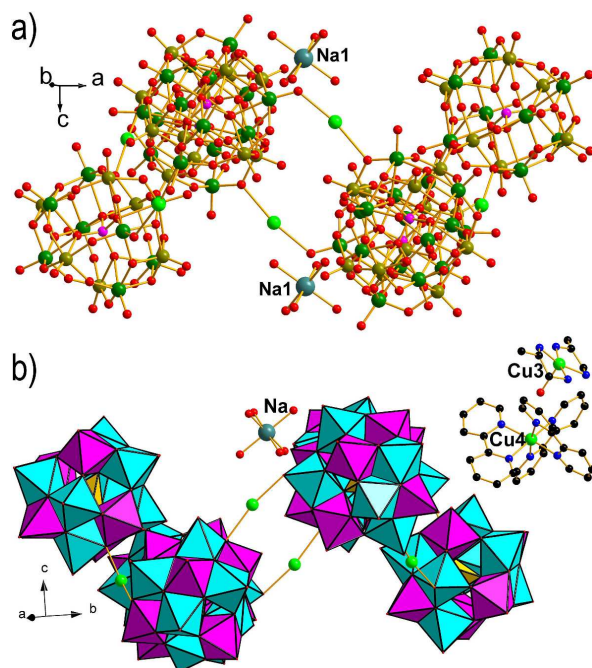

**Figure S8** (a) The  $\{\text{Na}(\text{H}_2\text{O})_6\}^+$  ions are along the  $S_6$  symmetry axis of the ring (All C, N and Cu1 atom are omitted for clarity); (b) the isolated counteranions,  $[\text{Cu}(3)(1,2\text{-dap})_2(\text{H}_2\text{O})]^{2+}$  and  $[\text{Cu}(4)(2,2'\text{-bipy})_3]^{2+}$  distribute around the polyoxoanion ring cluster.

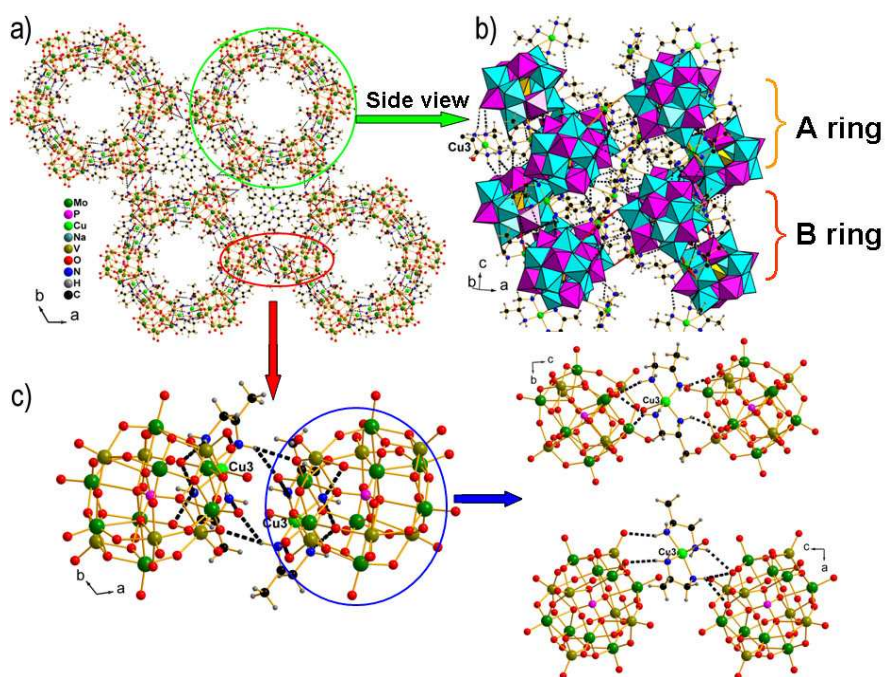

**Figure S9** (a) Top view of the infinite 3-D architecture. (b) Side view of the ring cluster: A ring and B ring are linked together through the hydrogen-bonding interaction between the  $[\text{Cu}(1)(1,2\text{-dap})_2]^{2+}$ ,  $[\text{Cu}(2)(1,2\text{-dap})_2]^{2+}$ ,  $[\text{Cu}(3)(1,2\text{-dap})_2(\text{H}_2\text{O})]^{2+}$  cations and ring clusters. (c) In the  $ab$  plane, the neighbouring rings are linked together through the hydrogen-bonding interaction between the  $[\text{Cu}(3)(1,2\text{-dap})_2(\text{H}_2\text{O})]^{2+}$  cations and ring clusters; in the  $bc$  or  $ac$  plane, the hydrogen-bonding interaction also exist between the  $[\text{Cu}(3)(1,2\text{-dap})_2(\text{H}_2\text{O})]^{2+}$  cations and ring clusters.

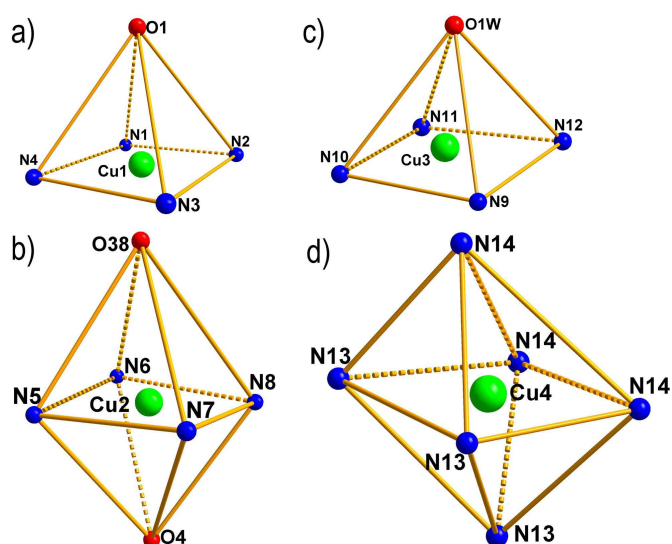

**Figure S10** The coordination geometric frameworks of the  $\text{Cu}(1)^{2+}$ ,  $\text{Cu}(2)^{2+}$ ,  $\text{Cu}(3)^{2+}$  and  $\text{Cu}(4)^{2+}$  cations.

### III. Physical measurement and characterization.

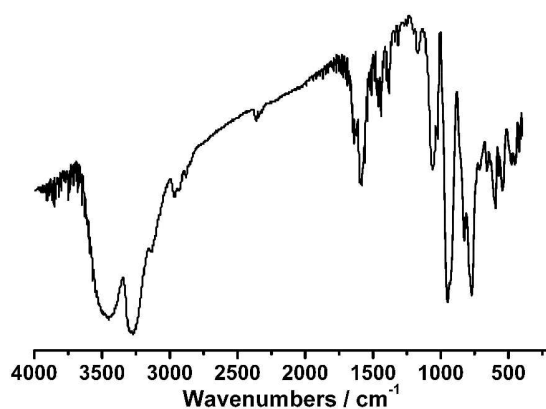

**Figure S11.** The IR spectrum of **1**.

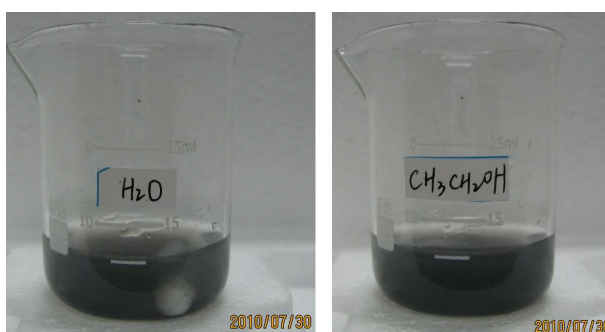

**Figure S12.** The photos for the solubility experiments of **1** in water (left) and ethanol solvent (right): 0.01 g sample **1** is added in the water or ethanol (10 mL). After stirred for 6 h, **1** still exist as the black solid in the solvent. Additionally, the solubility experiments phenomena in methanol and acetonitrile solvent is the same as above.

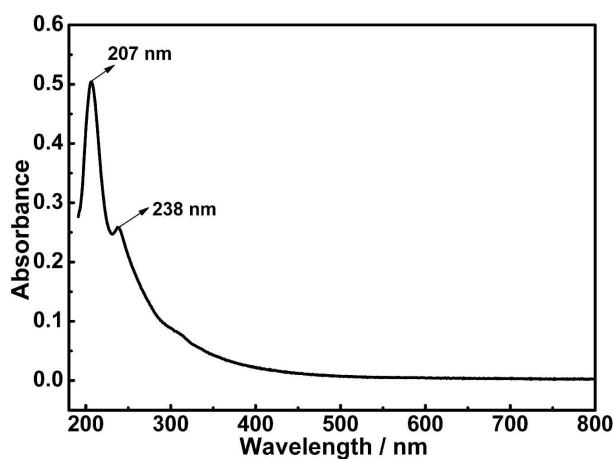

**Figure S13.** The UV spectrum of **1** in the saturated aqueous solution.

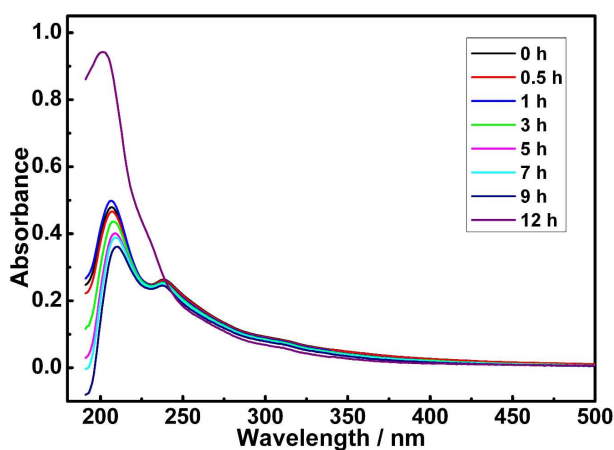

**Figure S14.** The in-situ UV spectra of **1** in the saturated aqueous solution with the period of 0–12 h, indicating that **1** begins to decompose after 9 h.

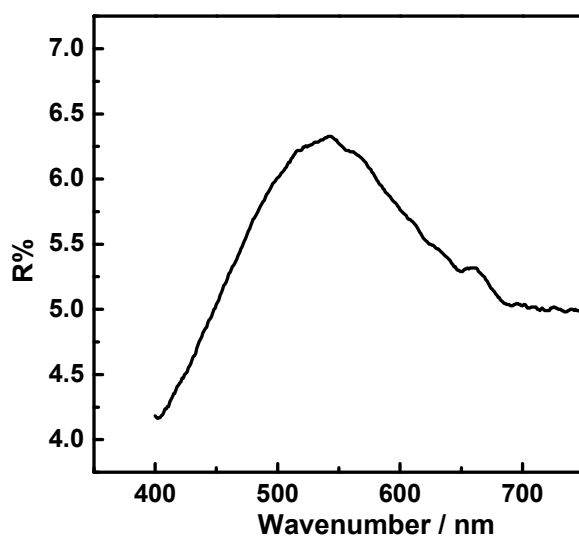

**Figure S15.** The visible-near-IR reflectance spectrum in solid of **1** showing an obvious absorption band at 544 nm attributed to the transition related to the black color.

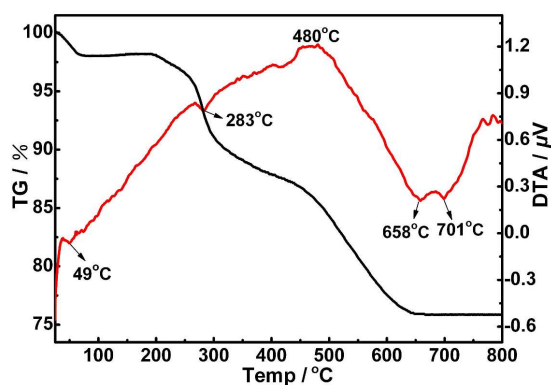

**Figure S16.** The TG-DTA curve of **1**.

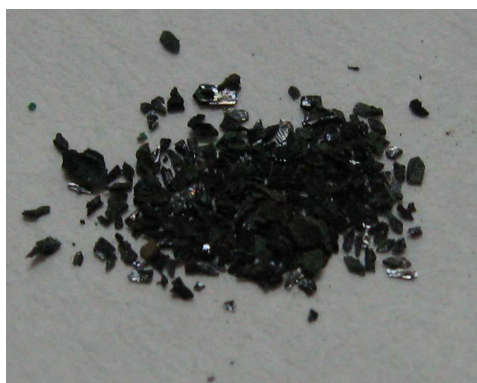

**Figure S17.** The black crystals of **1**.

#### IV. Cationic exchange study.

Considering the 3-D supramolecular channel characteristic of **1** with  $[\text{Na}(\text{H}_2\text{O})]^+$  ions as the counter cations, we want to explore its cationic exchange property with other cations, such as  $\text{Ag}^+$ ,  $\text{NH}_4^+$ ,  $\text{K}^+$  and  $\text{Ba}^{2+}$  ions.

Experiment: 0.01 g sample **1** was added to the  $1 \text{ mol}\cdot\text{L}^{-1}$   $\text{AgNO}_3$ ,  $\text{NH}_4\text{Cl}$ ,  $\text{KCl}$  and  $\text{BaCl}_2$  aqueous solution, respectively. After the mixture was stirred for 6 h, the samples in  $\text{AgNO}_3$ ,  $\text{KCl}$  and  $\text{BaCl}_2$  aqueous solution still exist as the black solids (Figure S18 left, the sample in  $\text{AgNO}_3$  as the example). The solids were filtered and washed with water. The results of the IR spectrum (Figure S19) and elemental analyses of the sample in  $\text{AgNO}_3$  suggest that **1** does not show the obvious cationic exchange behavior with the  $\text{Ag}^+$  cations. Similarly, **1** also does not show the obvious cationic exchange behavior with the  $\text{K}^+$  or  $\text{Ba}^{2+}$  cations. Interestingly, when the sample was treated with  $\text{NH}_4\text{Cl}$  for 6 h, **1** was completely dissolved and decomposed (Figure S18 right, S20). We presume that **1** can't be stably in the acidic  $\text{NH}_4\text{Cl}$  aqueous solution due to the stronger acidity of the solution, which was further confirmed by the phenomenon that the sample was dissolved in  $0.01 \text{ mol}\cdot\text{L}^{-1}$   $\text{HCl}$  solution (Figure S21).

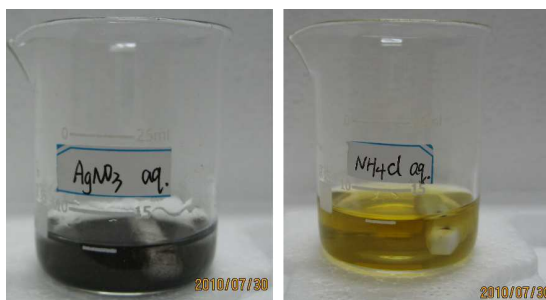

**Figure S18.** The cationic exchange experiments of **1** in  $1 \text{ mol} \cdot \text{L}^{-1} \text{ AgNO}_3$  (left) and  $1 \text{ mol} \cdot \text{L}^{-1} \text{ NH}_4\text{Cl}$  aqueous solution (right).

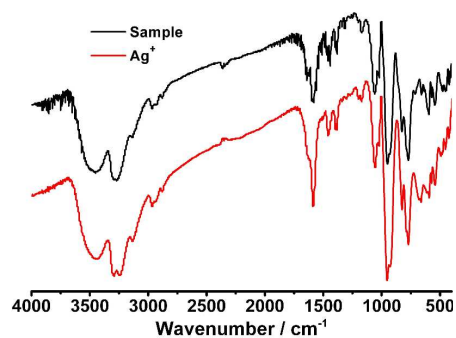

**Figure S19.** IR spectra of the original sample **1** and the sample treated by the  $1 \text{ mol} \cdot \text{L}^{-1} \text{ AgNO}_3$ .

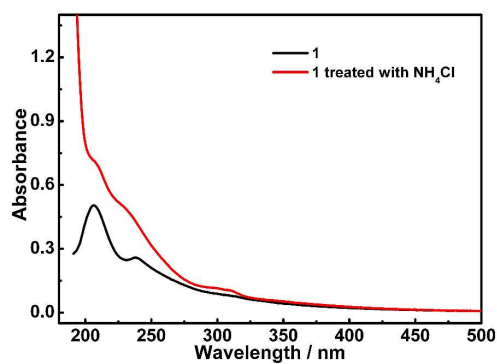

**Figure S20.** Comparison of the UV spectra of **1** and the sample treated by  $\text{NH}_4\text{Cl}$  solution.

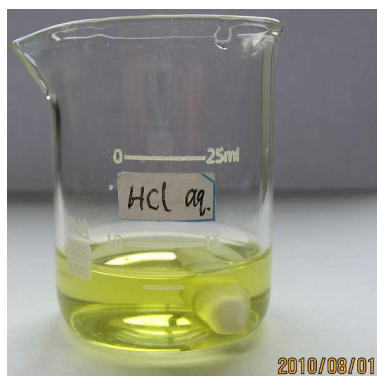

**Figure S21.** The phenomenon that **1** was dissolved in  $0.01 \text{ mol} \cdot \text{L}^{-1} \text{ HCl}$  aqueous solution.

Table S1 Hydrogen Bond Lengths (Å) and Bond Angles (°) of **1**.

| D–H...A        | d(D–H) | d(H...A) | d(D...A) | ∠D–H...A |
|----------------|--------|----------|----------|----------|
| N1–H1C...O16   | 0.900  | 2.244    | 3.115    | 162.67   |
| N1–H1D...O31   | 0.900  | 2.251    | 3.124    | 163.55   |
| N2–H2B...O34   | 0.900  | 2.317    | 3.177    | 159.65   |
| N2–H2C...O14   | 0.900  | 2.206    | 3.059    | 158.10   |
| N3–H3D...O14   | 0.900  | 2.480    | 3.166    | 133.26   |
| N3–H3D...O26   | 0.900  | 2.535    | 3.063    | 118.05   |
| N3–H3E...O9    | 0.900  | 2.096    | 2.915    | 150.95   |
| N4–H4B...O7    | 0.900  | 1.990    | 2.876    | 167.83   |
| N4–H4C...O10   | 0.900  | 2.063    | 2.859    | 146.77   |
| N5–H5A...O12   | 0.900  | 2.173    | 2.940    | 142.73   |
| N5–H5B...O2    | 0.900  | 2.144    | 2.993    | 156.98   |
| N6–H6D...O34   | 0.900  | 2.322    | 3.173    | 157.65   |
| N6–H6D...O9    | 0.900  | 2.500    | 3.151    | 129.60   |
| N6–H6E...O27   | 0.900  | 1.968    | 2.831    | 159.97   |
| N7–H7C...O12   | 0.900  | 2.330    | 3.074    | 139.90   |
| N7–H7C...O31   | 0.900  | 2.478    | 3.228    | 141.12   |
| N8–H8A...O17   | 0.900  | 2.020    | 2.916    | 173.80   |
| N8–H8B...O9    | 0.900  | 1.959    | 2.799    | 154.75   |
| N9–H9D...O28   | 0.900  | 2.489    | 3.002    | 116.66   |
| N9–H9D...O2    | 0.900  | 2.642    | 3.224    | 123.19   |
| N9–H9E...O21   | 0.900  | 2.578    | 3.193    | 126.19   |
| N9–H9E...O29   | 0.900  | 2.595    | 3.347    | 141.60   |
| N10–H10C...O6  | 0.900  | 2.629    | 3.131    | 116.13   |
| N10–H10C...O19 | 0.900  | 2.630    | 3.530    | 177.35   |
| N10–H10D...O6  | 0.900  | 2.435    | 3.142    | 135.65   |
| N11–H11B...O11 | 0.900  | 2.390    | 3.243    | 158.15   |
| N11–H11C...O6  | 0.900  | 2.368    | 3.057    | 133.45   |
| N11–H11C...O32 | 0.900  | 2.483    | 3.297    | 150.58   |
| N12–H12D...O29 | 0.900  | 2.482    | 3.270    | 146.38   |
